# Supplementary material
Source: PubMed Central journal article supplement (PMC3844053)
Supplement: NIHMS474639-supplement-Sup_data.pdf [file NIHMS474639-supplement-Sup_data.pdf]

## SUPPLEMENTAL FILE

**Supplemental Figure 1:** Specificity of Myo1c 5 antibody was determined by pre-incubating the antibody with Myo1c full length protein prior to the staining of zebrafish embryos. Pre-incubation with Myo1c protein completely blocked Myo1c 5 antibody staining confirming the specificity of this antibody.

**Supplemental Figure 2:** Construction and characterization of DIG labeled RNA probes includes PCR of Nephtrin and Myo1c homologs, purification of PCR products, qualitative analysis of the RNA generated from cDNA and dot blot assay to determine RNA labeling with DIG.

**Supplemental Figure 3: (A)** The whole mount *in-situ* hybridization of zebrafish embryos showed that both Myo1c homologs are expressed in and around the glomerular region. **(B)** *In situ* hybridization of zebrafish sections using anti-sense RNA probes (experimental) and sense probes (control) against the Myo1c homologs reveals a widespread expression of both Myo1c homologs in various tissues including glomerulus.

**Supplemental Figure 4:** (A) The two categories of edema, moderate (prominent pericardial edema) and severe (whole body edema) used in our experimental analysis are shown. (B) The capped mRNA from mouse Myo1c ortholog was prepared and co-injected with Myo1c morpholinos in one cell stage embryos and the phenotypic rescue was determined at 48-72hpf. Representative images from multiple independent experiments show that in addition to edema, the physical deformities are significantly reduced in rescued (Myo1c\_Ch5/15\_MO + GFP-Myo1c RNA) fish.

**Supplemental Figure 5:** Histological comparison of 72hpf control and Myo1c morphant embryos shows renal deformities, where prominent tubular dilation and enlarged bowman's space was noted in the Myo1c knockdown embryos. Presence of edema in the vicinity of gut region was also observed in the mutant fish.

**Supplemental Figure 6:** The Myo1c knockdown and control embryos (96hpf) were injected with 500kD Rhodamine labeled dextran through common cardinal vein. The presence of red

dextran in the tubules of cross sectioned embryos is indicated by the arrows. The images were stained and analyzed by fluorescence microscopy.

**Supplemental Table 1:** Sequences of primers used in our experiments to construct DIG labeled RNA probes (anti-sense and sense) against the two Myo1c homologs and Nephrin are listed.

### Supplement figure 1

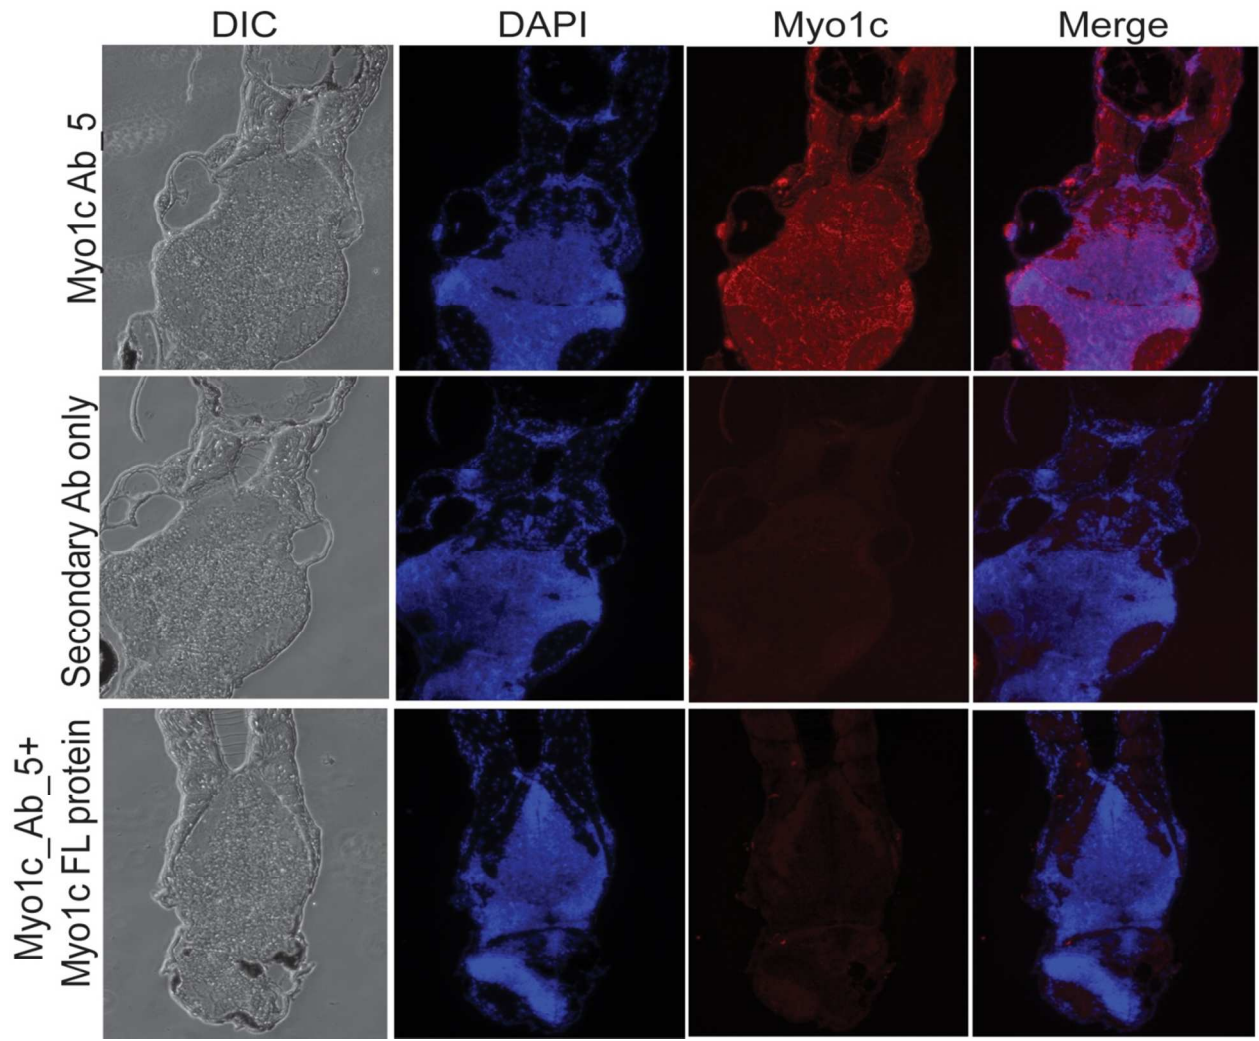

## Supplement Figure 2

PCR from specific primers

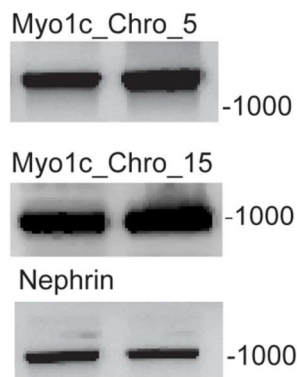

Purified PCR Product

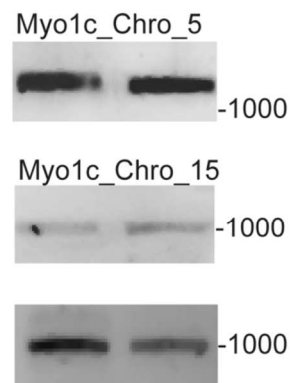

DIG dot blot RNA Labeling

|    |    |    |    |    |    |    |
|----|----|----|----|----|----|----|
| 1  | 2  | 3  | 4  | 5  | 6  | 7  |
| 8  | 9  | 10 | 11 | 12 | 13 | 14 |
| 15 | 16 | 17 | 18 | 19 | 20 | 21 |
| 22 | 23 | 24 | 25 | 26 | 27 |    |

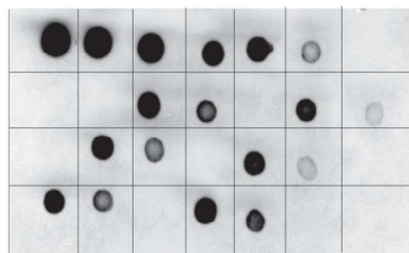

1-9 = Control Labelled RNA  
 10-12 = Nephrin Experimental RNA  
 13-15 = Nephrin Control RNA  
 16-18 = Myo1c Chr\_5 Experimental RNA  
 19-21 = Myo1c Chr\_5 Control RNA  
 22-24 = Myo1c Chr\_15 Experimental RNA  
 25-27 = Myo1c Chr\_15 Control RNA

RNA Quality on gel

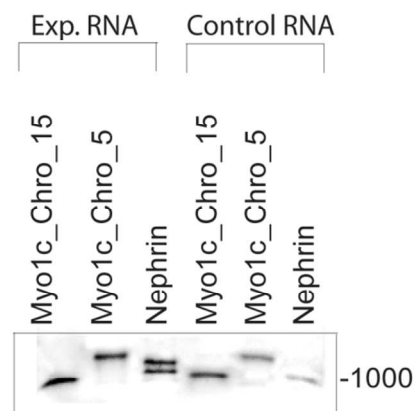

### Supplement Figure 3

(A)

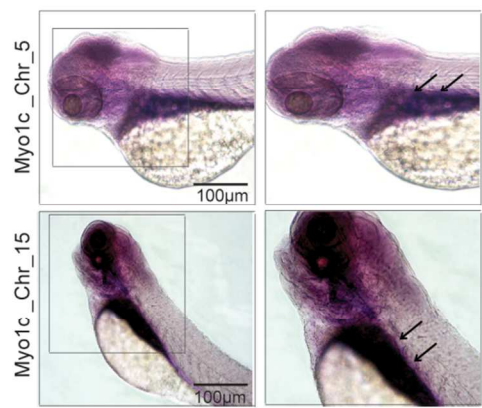

(B)

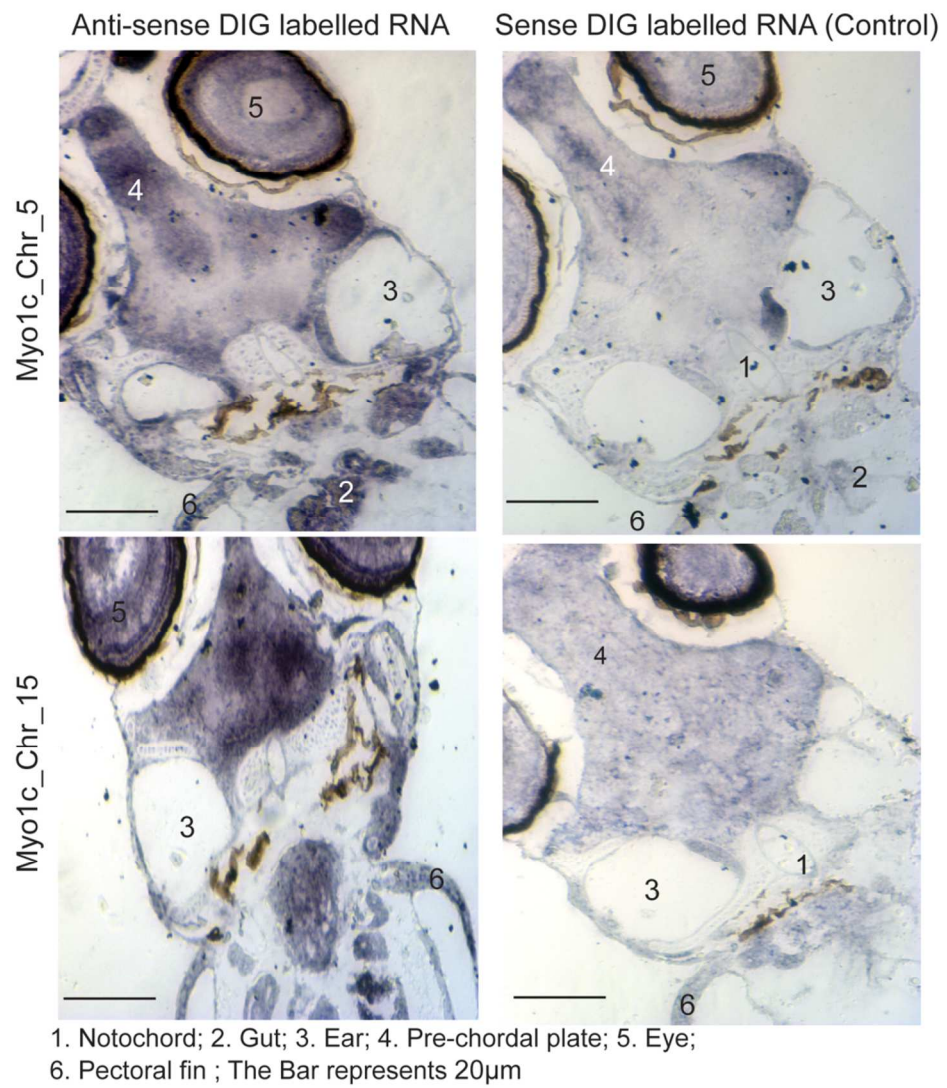

## Supplement Figure 4

(A)

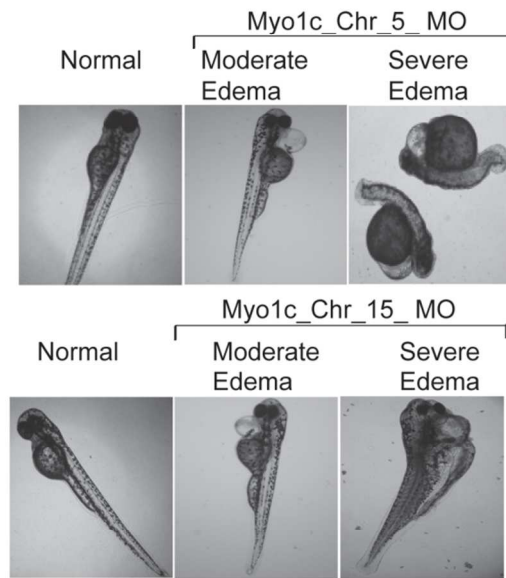

(B)

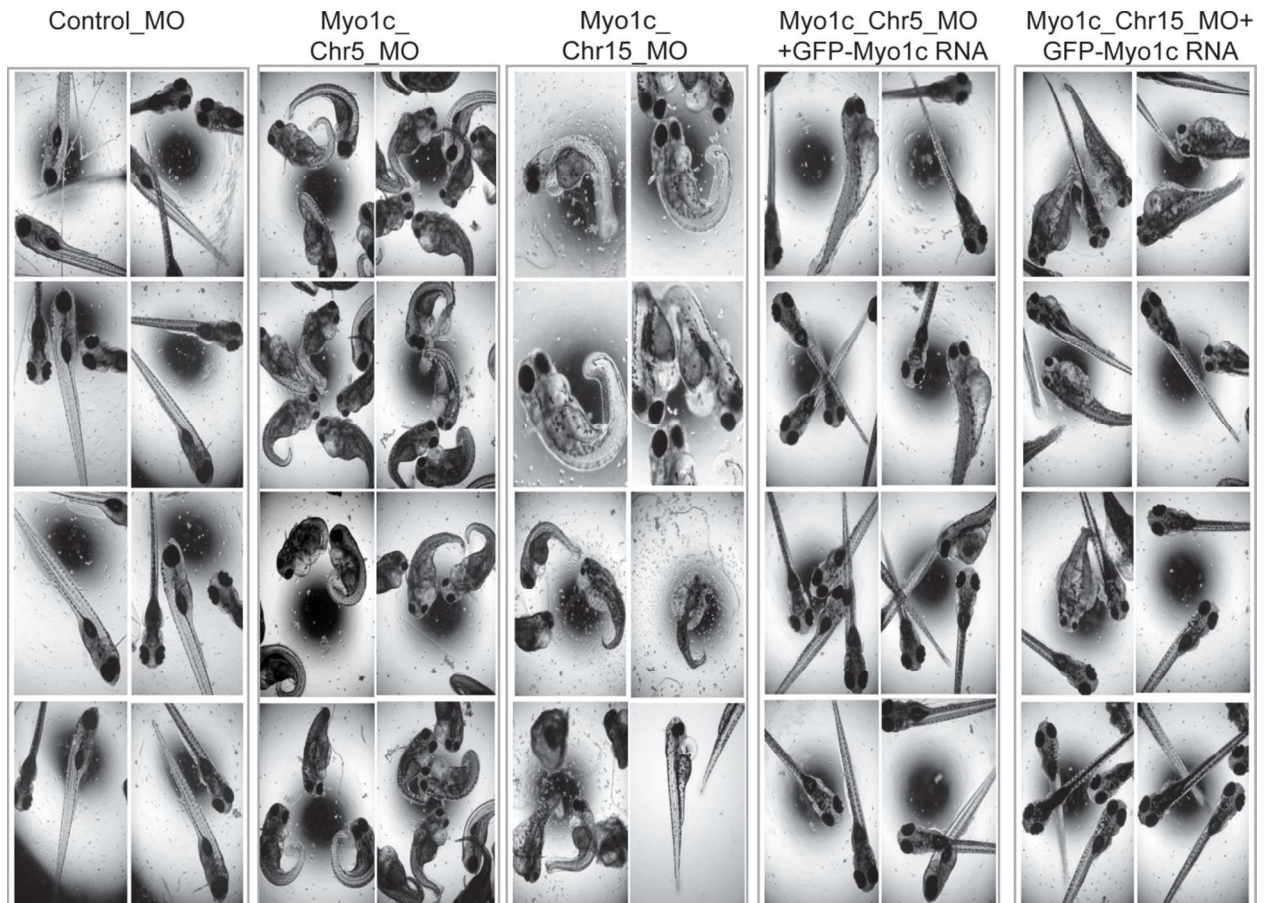

### Supplement Figure 5

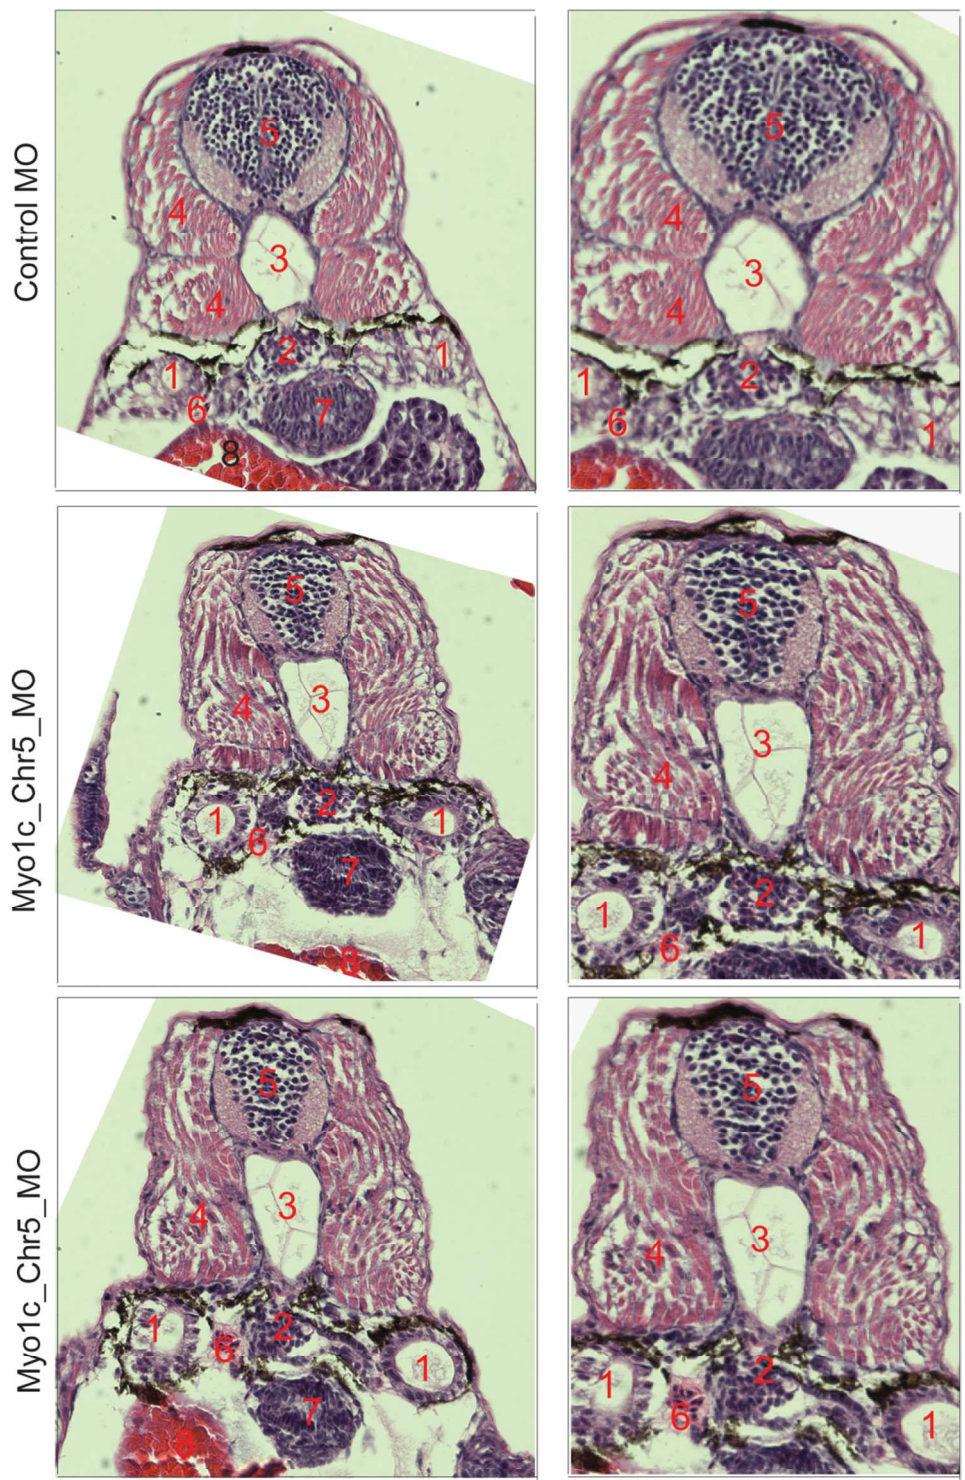

1. Tubules; 2. Glomerulus; 3. Notochord; 4. Somitic Muscle; 5. Neural tube; 6. Common Cardinal Vein; 7. Gut; 8. Yolk

# Supplement Figure 6

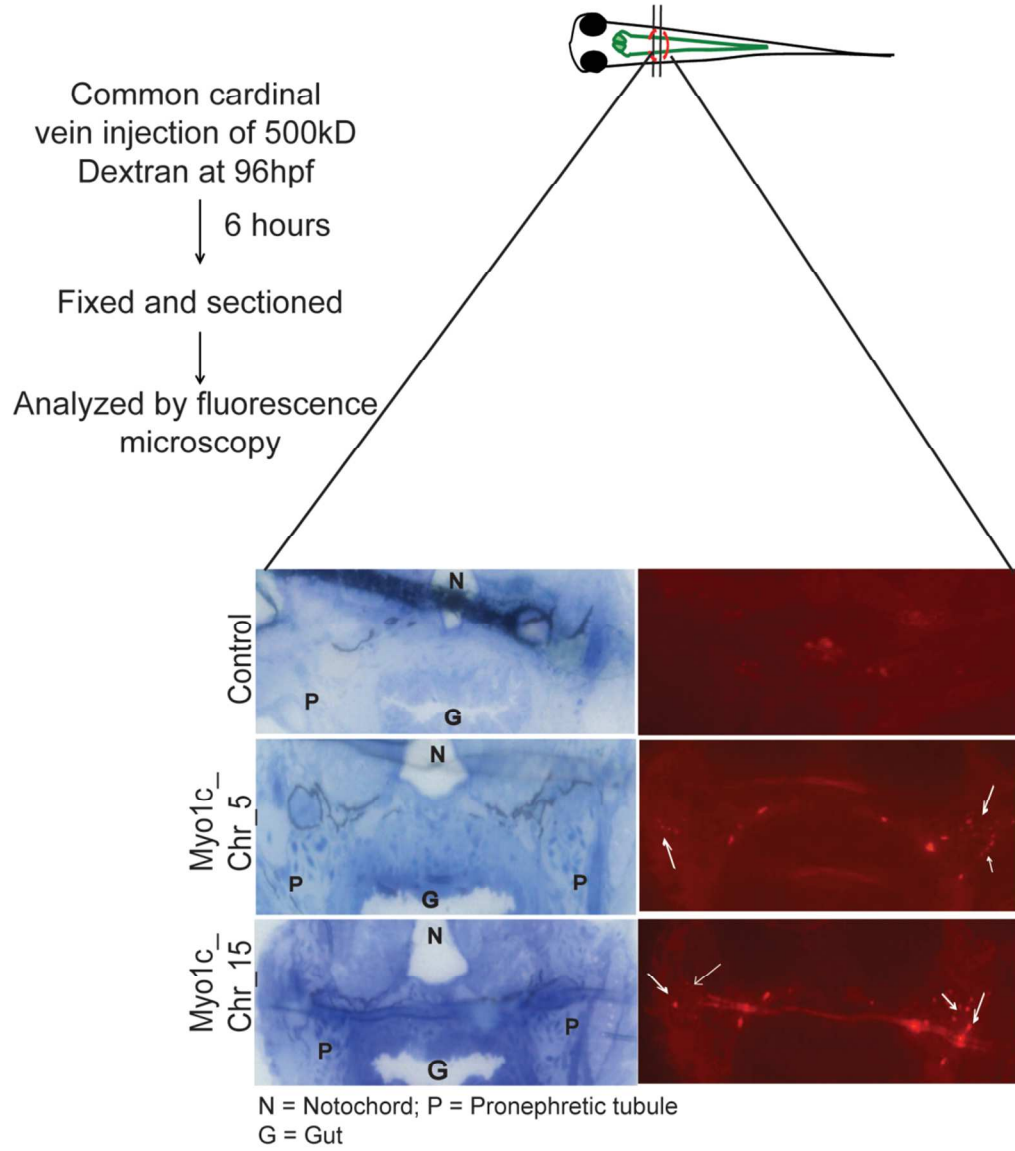



## SUPPLEMENTAL TABLE 1

Primers used for the construction of RNA probe

### Myo1c Chromosome 5

Experimental /Antisense

Myo1c\_FP\_ISHE: GAAAACCTGCGCCGGCGGTAC

Myo1c\_RP\_ISHE: TAATACGACTCACTATAGGGTCTCCCAGCCTTCGGCCTCA

Control/Sense

Myo1c\_FP\_ISHC: TAATACGACTCACTATAGGGGAAAACCTGCGCCGGCGGTAC

Myo1c\_RP\_ISHC: TCTCCCAGCCTTCGGCCTCA

### Myo1c Chromosome 15

Experimental /Antisense

Myo1c15\_FP\_ISHE: TGAGAACCTCCGCAAACGC

Myo1c15\_RP\_ISHE: TAATACGACTCACTATAGGGGTGCACGACGCGGGATTCT

Control/Sense

Myo1c15\_FP\_ISHC: TAATACGACTCACTATAGGGGTGAGAACCTCCGCAAACGC

Myo1c15\_RP\_ISHC: GTGCACGACGCGGGATTCT

### Nephrin

Experimental /Antisense

Nephrin\_FP\_ISHE: GTGAACGTGTCTCGGCGGGAC

Nephrin\_RP\_ISHE: TAATACGACTCACTATAGGGTTTCGCATCAGCAGTGGTGACCA

Control/Sense

Nephrin\_FP\_ISHC: TAATACGACTCACTATAGGGGTGAACGTGTCTCGGCGGGAC

Nephrin\_RP\_ISHC: TTCGCATCAGCAGTGGTGACCA
